# Supplementary material for: Condensin I Recruitment to Base Damage-Enriched DNA Lesions Is Modulated by PARP1
Source: PubMed Central journal article supplement (PMC3155556; doi:10.1371/journal.pone.0023548), 2011-08-12

**Figure S3. Chromatin association of condensin I in PARP1 knockout cells.** The wild type and PARP1 knockout mouse embryonic fibroblasts (MEFs) [1] were treated with or without H<sub>2</sub>O<sub>2</sub> and chromatin fractions were purified by CSK extraction [2] and probed for mouse CAP-D2 and PARP1 by western blotting.

1. Wang ZQ, Auer B, Stingl L, Berghammer H, Haidacher D, et al. (1995) Mice lacking ADPRT and poly(ADP-ribosyl)ation develop normally but are susceptible to skin disease. *Genes & Dev* 9: 509-520.
2. Heale JT, Ball J, A. R., Schmiesing JA, Kim JS, Kong X, et al. (2006) Condensin I interacts with the PARP-1-XRCC1 complex and functions in DNA single-stranded break repair. *Mol Cell* 21: 837-848.

Figure S3

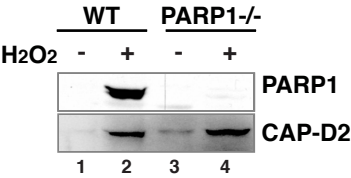

Supplement: pone.0023548.s003.pdf [file pone.0023548.s003.pdf]
